# Supplementary material
Source: PubMed Central journal article supplement (PMC7893522)
Supplement: AJSLP-29-1335-s001.pdf [file AJSLP-29-1335-s001.pdf]

### Structuring Intervention to Improve Communicative Participation

The blank diagram below can be used by the clinician and client to create a visual guide for their plan by filling in the chosen communication situation and the relevant goals for each component of the diagram. The following pages provide a step by step guide that clinicians can use to document goals and data. This form may be reprinted for clinical use.

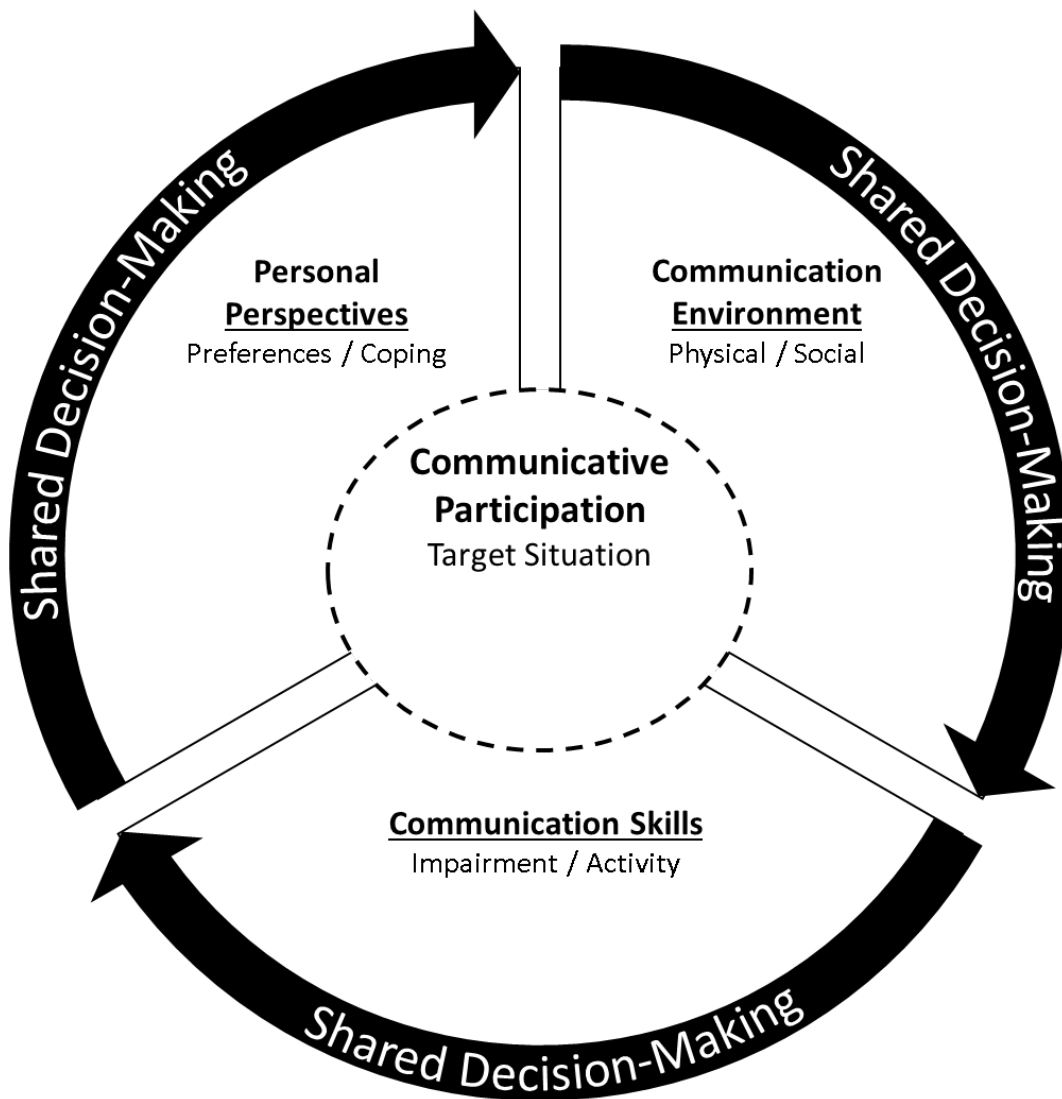

**Step 1: Assess baseline overall communicative participation**

(Data from interview and patient-reported measures of satisfaction with communication in life situations)

**Step 2: Select a specific situation to target in intervention**

(Based on assessment of communication needs and client preferences)

**Step 3: Measure baseline participation in the chosen situation and write participation-focused goals**

(Ideas include goal-attainment scaling or patient-reported Likert scale)

Baseline method of measurement and data:

Goal:

**Step 4: Measure baseline communication skills in the chosen situation and write skills-based goals**

Baseline method of measurement and data:

Goal:

**Step 5: Measure baseline environmental barriers in the chosen situation and write relevant goals for environmental modifications**

Baseline method of measurement and data:

***The physical environment:***

| <b>Environmental Feature</b>                                                     | <b>What works well?</b> | <b>What does NOT work well?</b> | <b>How much of a problem is this per client report? (0 = none; 5 = extreme)</b> |
|----------------------------------------------------------------------------------|-------------------------|---------------------------------|---------------------------------------------------------------------------------|
| <b>Noise</b>                                                                     |                         |                                 | <b>0 1 2 3 4 5</b>                                                              |
| <b>Space (large rooms; outside)</b>                                              |                         |                                 | <b>0 1 2 3 4 5</b>                                                              |
| <b>Phone</b>                                                                     |                         |                                 | <b>0 1 2 3 4 5</b>                                                              |
| <b>Other technology (automated phone systems, drive-through intercoms, etc.)</b> |                         |                                 | <b>0 1 2 3 4 5</b>                                                              |
| <b>Being able to see / be seen by communication partners (different rooms)</b>   |                         |                                 | <b>0 1 2 3 4 5</b>                                                              |
| <b>Things I need to read (computer, textbooks, etc.)</b>                         |                         |                                 | <b>0 1 2 3 4 5</b>                                                              |
| <b>Things I need to write (forms, emails)</b>                                    |                         |                                 | <b>0 1 2 3 4 5</b>                                                              |
|                                                                                  |                         |                                 | <b>0 1 2 3 4 5</b>                                                              |

|  |  |  |                    |
|--|--|--|--------------------|
|  |  |  | <b>0 1 2 3 4 5</b> |
|  |  |  | <b>0 1 2 3 4 5</b> |

***Communication Partners who influence participation:***

| <b>Person</b> | <b>How do they help with communication?</b> | <b>What is NOT helpful for communication?</b> | <b>How much of a problem is this per client report? (0 = none; 5 = extreme)</b> |
|---------------|---------------------------------------------|-----------------------------------------------|---------------------------------------------------------------------------------|
|               |                                             |                                               | <b>0 1 2 3 4 5</b>                                                              |
|               |                                             |                                               | <b>0 1 2 3 4 5</b>                                                              |
|               |                                             |                                               | <b>0 1 2 3 4 5</b>                                                              |
|               |                                             |                                               | <b>0 1 2 3 4 5</b>                                                              |

Goals:

**Step 6: Measure baseline relevant personal perspectives in the chosen situation and write goals**

Baseline method of measurement and data:

Goals:

**This process and document should be replicated for as many specific situations as the client wants to target in intervention.**
